1                   **A rapid visuomotor response on the human upper**  
2                   **limb is selectively influenced by implicit,**  
3                   **but not explicit, motor learning**

4 Chao Gu(顾超)<sup>1-2</sup>, J. Andrew Pruszynski<sup>1-4</sup>, Paul L. Gribble<sup>1-3</sup>, and Brian D. Corneil<sup>1-5,\*</sup>  
5 <sup>1</sup>Departments of Psychology and <sup>3</sup>Physiology & Pharmacology; University of Western Ontario;  
6 London, ON, N6A 5B7; Canada  
7 The <sup>2</sup>Brain and Mind Institute and <sup>4</sup>Robarts Research Institute; University of Western Ontario;  
8 London, ON, N6A 5B7; Canada  
9 <sup>5</sup>Lead Contact  
10 \*Correspondence: bcorneil@uwo.ca

11  
12 Corresponding Author:  
13 Dr. Brian D. Corneil  
14 Robarts Research Institute  
15 University of Western Ontario  
16 1151 Richmond St. N,  
17 London, Ontario, Canada, N6A 5B7  
18 Tel: (519)-663-577, Ext: 24132  
19 Email: bcorneil@uwo.ca

20  
21 **Keywords:** Human, reaching movement, EMG, motor learning, visuomotor transformation,  
22 error-based learning

23  
24

## 25 **SUMMARY**

26 How do humans learn to adapt their motor actions to achieve task success? Recent behavioral  
27 and patient studies have challenged the classic notion that motor learning arises solely from the  
28 errors produced during a task, suggesting instead that explicit cognitive strategies can act in  
29 concert with the implicit, error-based, motor learning component. Here, we show that the earliest  
30 wave of directionally-tuned neuromuscular activity that occurs within ~100 ms of peripheral  
31 visual stimulus onset is selectively influenced by the implicit component of motor learning. In  
32 contrast, the voluntary neuromuscular activity associated with reach initiation, which evolves  
33 ~100 to 200 ms later is influenced by both the implicit and explicit components of motor  
34 learning. The selective influence of the implicit, but not explicit, component of motor learning on  
35 the earliest cascade of neuromuscular activity supports the notion that these components of  
36 motor learning can differentially influence descending motor pathways.

## 37 INTRODUCTION

38 Motor learning occurs throughout the human lifespan, from children learning to walk to the aged  
39 adjusting to a new set of reading glasses. Motor learning involves establishing and constantly  
40 recalibrating the mapping of a desired goal onto the required motor commands [1]. A  
41 predominate theory of motor learning posits that learning arises from an *implicit* error-based  
42 process, in which the brain learns by computing an error between actual and predicted sensory  
43 consequences of the generated motor command [2,3]. Recent behavioral work using a  
44 visuomotor rotation task [4] which systematically rotates the visual cursor denoting hand  
45 position around the center of the workspace, has suggested that a second *explicit* process also  
46 contributes to motor learning [5–7]. The explicit process is driven by awareness of task errors,  
47 which participants exploit to achieve task success. Research with individuals who have brain  
48 lesions shows that the implicit and explicit components of motor learning have distinctive neural  
49 substrates, relying on the integrity of cerebellar [8,9] and frontal circuits [10,11], respectively.  
50 However, multiple descending pathways originating from the cortex and brainstem contribute to  
51 motor control in healthy individuals [12–14] and the comparative influence of the implicit and  
52 explicit components of motor learning on these pathways is not known.

53 Our interest here is to compare the effect of motor learning on the first wave of  
54 directionally-tuned upper limb muscle activity that occurs time-locked ~100 ms after visual  
55 stimulus onset (termed *stimulus-locked responses*, or *SLRs*) [15] to the muscle activity that  
56 occurs at the time of reach initiation, roughly ~200-300 ms after stimulus onset [16]. Previous  
57 work has shown that the largest SLRs occur when stimuli are presented at locations associated  
58 with the largest reach-related responses [15,17], and SLRs persist even if the reach movement is  
59 withheld [18,19] or proceeds in the opposite direction [20]. These response properties, as well as

60 the fact that SLRs evolve at latencies that preclude extensive cortical processing, have led us to  
61 propose that SLRs and later reach-related activity arise from distinct descending motor pathways  
62 [15,20].

63 Here, we study how the implicit and explicit components of motor learning influence  
64 these two waves of EMG activity during the visuomotor rotation task. Success in this task  
65 requires that participants learn a new mapping between the location of the visual stimulus and  
66 the direction of the reach movement. We quantify the change in directional tuning of the SLR  
67 and reach-related activity across three different variants of the visuomotor rotation task that  
68 either combine or isolate the implicit and explicit components of motor learning. We show that  
69 changes in SLR tuning only occur during tasks that involve implicit motor learning, and that the  
70 partial shifts in SLR tuning observed during these experiments ( $\sim 10\text{-}15^\circ$  for rotations of both 40  
71 and  $60^\circ$ ) are consistent with previous estimates of implicit learning based on verbal reports of  
72 participants' explicit aiming direction [6,21]. In contrast, the tuning of reach-related activity  
73 shifts completely in all tasks, consistent with influences of both implicit and explicit motor  
74 learning. Taken together, our results show that the earliest wave of muscle activity following a  
75 visual stimulus is selectively influenced by implicit motor learning, whereas later voluntary  
76 waves of muscle activity are influenced by both implicit and explicit motor learning.

77

## 78 **RESULTS**

79 In all three experiments, participants ( $N = 8, 14, \text{ and } 18$ , respectively, 4 participants performed in  
80 multiple experiments) sat at a desk and used their right hand to interact with the handle of a  
81 robotic manipulandum that controlled the position of a cursor, presented on a horizontal mirror  
82 reflecting a downward facing LCD screen (**METHODS**). The participant's right arm was

83 occluded throughout all experiments; thus, the position of the cursor was the only visual cue of  
84 the manipulandum presented to the participants. The visuomotor rotations in Experiments 1 and  
85 2 were introduced by rotating the visual feedback of the cursor around the central starting  
86 position (**Fig. 1d**). In all three experiments, we measured both the  $x$ - and  $y$ -positions of the  
87 manipulandum and the EMG activity from the right pectoralis major (PEC) muscle while  
88 participants performed right-handed reach movements to one of eight peripheral stimuli equally  
89 spaced 10 cm around the starting position.

90 **Figure 1a** shows the normalized mean  $\pm$  SD movement trajectories for both the leftward  
91 ( $180^\circ$  CCW from straight right) and rightward ( $0^\circ$ ) stimulus locations from a representative  
92 participant, when they had veridical visual feedback of their hand position (i.e., the cursor moved  
93 in register with the participant's hand). **Figure 1b** shows the corresponding normalized mean  $\pm$   
94 SEM (top) and individual (bottom color panels) PEC EMG activity from leftward and rightward  
95 trials. EMG activity was aligned to the onset of the peripheral visual stimulus onset (thick black  
96 vertical lines), and individual trials were sorted based on reaction time (RT; squares, fastest to  
97 slowest from bottom to top). We observed a reliable SLR, which consisted of a brief increase or  
98 decrease in EMG activity  $\sim 100$  ms after the presentation of leftward or rightward stimulus  
99 locations, respectively [15,18,20]. We defined the SLR magnitude for each trial as the mean  
100 EMG activity during the SLR epoch (85-125 ms after stimulus onset, shaded regions in mean  
101 EMG sub-panels in **Fig. 1b**).

102 To determine the directional tuning of the EMG activity during both the SLR and the  
103 later reach-related response (MOV, -20 to 20 ms around RT) epochs, we derived the preferred  
104 direction (PD) of each epoch assuming a sinusoidal fit (**Eq. 1**). **Figure 1c** shows the log-  
105 normalized EMG activity as a function of visual stimulus location (arrows indicate the PDs of

106 each fit). With veridical feedback, a reliable SLR was detected in 29 out of 32 participants (see  
107 *ROC analysis* in **METHODS** for detection criteria). Consistent with a previous study [15], we  
108 also found a small but reliable difference in PD of EMG activity between the SLR and MOV  
109 epochs (mean  $\pm$  SEM:  $172.5^\circ \pm 1.6^\circ$  and  $180.0^\circ \pm 1.2^\circ$ , respectively, paired *t*-test,  $t_{36} = -4.0$ ,  $P =$   
110 0.001). Data from participants who did not exhibit an SLR were excluded from all subsequent  
111 analyses (see **METHODS** for exact numbers for each experiment). Having established the  
112 tuning of EMG activity during the SLR and MOV epochs with veridical hand position feedback,  
113 we next examined how the PDs changed during two different visuomotor rotation tasks (**Fig. 1d**)  
114 and a mental visuomotor rotation task (**Fig. 1e**).

115

#### 116 *Partial adaptation of the SLR during an abrupt 60° CW visuomotor rotation*

117 In Experiment 1, we used an abrupt visuomotor rotation task which has been previously shown  
118 to engage both implicit and explicit motor learning components [5,6]. During both the Pre- and  
119 Post-Rotation blocks (**Fig. 2a**, black and blue shades, respectively), participants ( $N = 7$ )  
120 performed 60 and 80 cycles (a cycle consists of 8 reaches, 1 reach per direction) of visually-  
121 guided reaches under veridical visual feedback, respectively. During the Peri-Rotation block (red,  
122 80 cycles), we imposed a 60° CW rotation on the visual cursor around the start position. **Figure**  
123 **2a** also shows the group mean  $\pm$  SEM reach endpoint (white dot and shade) plotted relative to  
124 the stimulus location, while the solid black line indicates perfect task performance. Consistent  
125 with previous experiments [22,23], our participants rapidly adapted their endpoint reach  
126 direction during the beginning of the Peri-Rotation block and exhibited signs of implicit learning  
127 as seen by the aftereffect during the beginning of the Post-Rotation block [5]. We excluded the  
128 first 20 cycles of both the Peri- and Post-Rotation blocks to ensure that participants' behavioral

129 performance had plateaued. We observed an increase in median RTs during the Peri-Rotation  
130 block (**Fig. 5a**, group mean  $\pm$  SEM =  $301 \pm 17$  ms) compared to either blocks with veridical  
131 feedback (Pre- and Post-Rotation,  $246 \text{ ms} \pm 14 \text{ ms}$  and  $254 \pm 13 \text{ ms}$ , paired  $t$ -test,  $t_6 = -7.5$  and  $-$   
132  $3.4$ ,  $P = 0.001$  and  $P = 0.01$ , respectively). Prolonged RTs during the visuomotor rotation task  
133 have been associated with explicit motor learning as participants employ an aiming strategy  
134 [24,25]. Thus, participants' behavior provided evidence for the engagement of both implicit and  
135 explicit motor learning components during this task.

136 **Figure 2b** shows mean movement trajectories and PEC EMG activity for the outward  
137 visual stimulus location ( $90^\circ$  CCW) across the three different blocks, for one participant. As seen  
138 from the mean movement trajectories, during Peri-Rotation (red) the participant learned that the  
139 imposed  $60^\circ$  CW visuomotor rotation required them to generate a left-outward reach movement  
140  $\sim 60^\circ$  CCW to the stimulus location. These left-outward movements during the Peri-Rotation  
141 block required more PEC recruitment compared to straight outward movements during both Pre-  
142 and Post-Rotation blocks. As expected, during the MOV epoch we observed reliable modulation  
143 in PEC EMG activity across blocks (1-way ANOVA, main effect,  $F_{(2,176)} = 486.4$ ,  $P < 10^{-71}$ ),  
144 with greater EMG activity during Peri- compared to both Pre- and Post-Rotation (post-hoc  
145 Tukey's HSD, both  $P < 10^{-9}$ ).

146 We also observed a similar pattern of modulation during the SLR epoch (1-way ANOVA,  
147 main effect,  $F_{(2,176)} = 7.97$ ,  $P = 0.001$ ), with greater EMG activity during the SLR epoch for Peri-  
148 compared to both Pre- and Post-Rotation blocks (post-hoc Tukey's HSD,  $P = 0.006$  and  $P =$   
149  $0.001$ , respectively). Thus, even though the same visual stimulus location was presented across  
150 all three blocks, the magnitude of the SLR changed during motor learning.

151 To quantify the influence of motor learning on directional tuning, we derived the PDs of  
152 EMG activity during the two different epochs for all three blocks (colored arrows in **Fig. 2c**). We  
153 normalized the results across participants by using each participant's PD during the Pre-Rotation  
154 block as a baseline and quantified the shifts in PD ( $\Delta$ PD) for both Peri- and Post-Rotation blocks  
155 (top panels in **Fig. 2c**). Across participants (**Fig. 2d**), we found that  $\Delta$ PD for the MOV epoch  
156 adapted almost completely during the Peri-Rotation block ( $\Delta$ PD mean  $\pm$  SEM =  $57.7 \pm 2.9^\circ$  CW,  
157 one sample  $t$ -test,  $t_6 = 19.61$ ,  $P < 10^{-5}$ ) to the imposed  $60^\circ$  CW visuomotor rotation (gray dashed  
158 line). Note this is expected as we aligned the tuning curves relative to visual stimulus location  
159 rather than the reach direction. We also found that  $\Delta$ PD returned to baseline during the Post-  
160 Rotation block ( $\Delta$ PD =  $0.7 \pm 1.6^\circ$  CW, one sample  $t$ -test,  $t_6 = 0.46$ ,  $P = 0.66$ ), and a reliable  
161 difference in  $\Delta$ PD between the Peri- and Post-Rotation blocks (2-way ANOVA – epoch and  
162 rotation blocks, interaction effect,  $F_{(1,24)} = 41.63$ ,  $P < 10^{-6}$ , post-hoc Tukey's HSD,  $P < 10^{-8}$ ).  
163 Thus, we observed nearly complete adaptation ( $\Delta$ PD  $\approx 60^\circ$  CW) and de-adaptation ( $\Delta$ PD  $\approx 0^\circ$   
164 CW) during the MOV epoch for the Peri- and Post-Rotation blocks, respectively.

165 We next examined the change in the directional tuning of EMG activity during the SLR  
166 epoch. Like the later MOV epoch, we also observed reliable adaptation during the Peri-Rotation  
167 block ( $\Delta$ PD =  $16.7 \pm 3.6^\circ$  CW, one-sample  $t$ -test,  $t_6 = 4.6$ ,  $P = 0.004$ ), and de-adaptation during  
168 the Post-Rotation block ( $\Delta$ PD =  $0.0 \pm 4.2^\circ$  CW, one-sample  $t$ -test,  $t_6 = 0.01$ ,  $P = 0.99$ ). However,  
169 the extent of adaptation during Peri-Rotation for the SLR epoch was reliably smaller than that  
170 during the later MOV epoch (2-way ANOVA – epoch and rotation blocks, post-hoc Tukey's  
171 HSD, Peri-Rotation – SLR vs MOV epoch,  $P < 10^{-7}$ ).

172 To summarize the results from Experiment 1, motor learning induced via an abrupt  $60^\circ$   
173 CW visuomotor rotation systematically altered the tuning of the SLR, despite its short-latency.



174 However, unlike the full adaptation of EMG in the later MOV epoch, we observed only partial  
175 adaptation of EMG during the SLR interval. The abrupt visuomotor rotation task is thought to  
176 engage both implicit and explicit motor learning components. In Experiment 2 we tested whether  
177 the shift in SLR tuning is still present when the explicit component of motor learning is  
178 minimized or eliminated.

179

180 *SLR adaptation occurs despite a lack of explicit awareness of a visuomotor rotation*

181 In Experiment 2, participants ( $N = 14$ ) performed a gradual visuomotor rotation task (**Fig. 3a**). A  
182 previous imaging study has suggested that abrupt and gradual visuomotor rotation tasks engage  
183 different neural substrates [26], and behavioral studies have shown that gradual visuomotor  
184 rotations produced larger aftereffects [27] and longer-lasting retention [28] compared to abrupt  
185 visuomotor rotations. In Experiment 2, we imposed a visuomotor rotation gradually ( $1^\circ$  per  
186 cycle). Once again, participants initially performed visually-guided reaches to one of eight  
187 equidistant visual stimuli with veridical feedback (**Fig. 3a**, Test Block 1, Pre-Rotation) for 40  
188 cycles. Then for the next 20 cycles, the visual feedback of the cursor was rotated either  $1^\circ$  CW or  
189 CCW per cycle (solid or dashed lines), counterbalanced between participants. Over the next 40  
190 cycles, the visual feedback remained rotated at  $20^\circ$  CW or CCW (Test Block 2). Afterwards, the  
191 feedback was rotated  $1^\circ$  per cycle in the opposite direction to the initial imposed rotation for 40  
192 cycles. Finally, the feedback remained constantly rotated at  $20^\circ$  CCW or CW (Test Block 3). We  
193 found no reliable differences in endpoint reach direction between the three Test Blocks based on  
194 the order of imposed rotation (2-way ANOVA, Test Blocks and group, main effect of group,  
195  $F_{(2,36)} = 0.07$ ,  $P = 0.93$ ). Thus, we pooled data from all participants together for the subsequent  
196 analyses.

197           The size of the imposed visuomotor rotation,  $1^\circ$  per cycle, during Experiment 2 is less  
198 than the trial-by-trial variance of the participants' reach endpoint during the Pre-Rotation block  
199 (Gaussian fit, mean  $\pm$  SD,  $\mu = 0.4 \pm 0.1$ ,  $\sigma^2 = 5.0 \pm 0.2$ , adjusted  $r^2 = 0.94 \pm 0.01$ ). Consistent  
200 with previous studies [29,30], participants reported no explicit awareness of changes in the  
201 underlying sensorimotor mapping at any point during the experiment. Further, unlike Experiment  
202 1, we found no difference in median RTs between veridical feedback (**Fig. 5b**, Pre-Rotation,  
203 mean  $\pm$  SD =  $232 \pm 5$  ms) and the two rotation blocks (CW and CCW,  $233 \pm 5$  ms and  $236 \pm 5$   
204 ms, paired  $t$ -test,  $t_{13} = -0.65$  and  $-1.48$ ,  $P = 0.52$  and  $P = 0.16$ , respectively). This lack of RT  
205 increase during the gradual visuomotor rotation is also consistent with a minimal influence of  
206 explicit aiming during the experiment.

207           **Figure 3b** shows mean movement trajectories and PEC EMG activity for one participant,  
208 for the left-inward stimulus location ( $225^\circ$  CCW) across the three Test Blocks: Pre-Rotation,  $20^\circ$   
209 CW, and  $20^\circ$  CCW (black, red, and blue traces, respectively). Like in Experiment 1, we found  
210 reliable differences in normalized EMG activity across the three blocks for both the SLR and  
211 MOV epochs for this stimulus location (1-way ANOVA, main effect,  $F_{(2,109)} = 5.74$  and  $57.6$ ,  $P$   
212 =  $0.004$  and  $P < 10^{-17}$ , respectively). For example, during the  $20^\circ$  CW rotation block, the  
213 participant generated reaches away from the PD of the PEC muscle, hence there was a decrease  
214 in mean EMG activity both during the MOV epoch (red trace in **Fig. 3b**, starting after  $\sim 150$  ms  
215 after stimulus onset post-hoc Tukey's HSD,  $P < 10^{-5}$ ) and during the SLR epoch (shaded region,  
216 post-hoc Tukey's HSD,  $P = 0.01$ ). **Figure 3c** shows the tuning curve fits during both the SLR  
217 and MOV epochs across the three different blocks for this participant, demonstrating the changes  
218 in the PD in both the SLR and MOV epochs for this participant.

219           When we examined the shifts in PD across our sample, as expected we observed full  
220  $\Delta$ PD adaptations of  $22.2 \pm 1.1^\circ$  CW and  $20.4 \pm 2.1^\circ$  CCW during the MOV epoch for the  $20^\circ$   
221 CW and  $20^\circ$  CCW rotation blocks relative to the Pre-Rotation block, respectively (**Fig. 3d**, right  
222 panel, 2-way ANOVA – Epoch and Rotation, interaction effect,  $F_{(1,52)} = 77.9$ ,  $P < 10^{-11}$ , post-hoc  
223 Tukey’s HSD,  $P < 10^{-8}$ ). When we performed the same analysis during the SLR epoch (**Fig. 3d**,  
224 left panel), we found that the SLR  $\Delta$ PD rotated  $10.5 \pm 1.7^\circ$  CW and  $2.3 \pm 1.6^\circ$  CCW for the  $20^\circ$   
225 CW and CCW rotation, respectively (post-hoc Tukey’s HSD,  $P < 10^{-4}$ ). As in Experiment 1, we  
226 observed a reliable smaller overall change in  $\Delta$ PD during the SLR versus MOV epoch when  
227 collapsing these changes across the  $20^\circ$  CW and  $20^\circ$  CCW rotation blocks ( $12.8 \pm 1.9^\circ$  and  $42.6$   
228  $\pm 2.1^\circ$ , paired  $t$ -test,  $t_{13} = 11.0$ ,  $P < 10^{-7}$ ).

229           Thus, as with an abrupt visuomotor rotation, motor learning induced by a gradual  
230 visuomotor rotation systematically altered the tuning of the SLR. Experiment 2 also  
231 demonstrated that explicit awareness of changes in the underlying visuomotor mapping is not  
232 required for the tuning of the SLR to change. However, the extent of adaptation during the SLR  
233 epoch was still reliably less than that observed in the later MOV epoch. This finding is consistent  
234 with literature suggesting that a cognitive strategy may still be engaged in the gradual  
235 visuomotor rotation task, despite the lack of explicit awareness [30].

236

### 237 *Changes in the explicit aiming strategy do not alter the PD of the SLR*

238 In Experiment 3 participants ( $N = 13$ ) performed a mental visuomotor rotation task [5,31].  
239 Unlike in the first two experiments, participants received veridical visual feedback of their hand  
240 position throughout the experiment. It has been proposed that this eliminates implicit motor  
241 learning, since such learning is thought to occur only when there is a mismatch between the

242 visual location of the virtual cursor and the participant's hand position [5,9]. Instead, participants  
243 were explicitly instructed to reach either directly to the stimulus location (VIS block, **Fig. 4a**,  
244 grey) or 90° CCW relative to the stimulus location (Rotation [ROT] block, red). The order of the  
245 blocks was counterbalanced between participants. To assist participants, all eight stimulus  
246 locations were presented as open circles throughout the whole experiment, and the peripheral  
247 stimulus onset occurred when one of the open circles filled in. Like in Experiment 1, we found  
248 an increase in median RTs during the ROT (**Fig. 5c**, mean  $\pm$  SEM = 398  $\pm$  15 ms) compared to  
249 VIS Block (243  $\pm$  7 ms, paired *t*-test,  $t_{12} = -17.8$ ,  $P < 10^{-9}$ ), supporting the idea that participants  
250 used an aiming strategy during the ROT block.

251 **Figure 4a** shows the endpoint reach direction from a participant who performed the ROT  
252 block first. There was no aftereffect during the initial few cycles after the end of the ROT block,  
253 which is consistent with the absence of implicit motor learning. **Figure 4b** shows a participant's  
254 mean movement trajectories and PEC EMG activity for leftward and rightward stimulus  
255 locations (180° and 0° location, filled and open lines, respectively). Note that regardless of the  
256 voluntary movement direction, we observed greater EMG activity after leftward compared to  
257 rightward stimulus presentation during the SLR epoch in both the VIS (**Fig. 4b**, black lines, 2-  
258 way ANOVA – direction and block, interaction effect,  $F_{(1,225)} = 12.57$ ,  $P = 0.0005$ , post-hoc  
259 Tukey's HSD,  $P < 10^{-8}$ ) and ROT blocks (red lines, post-hoc Tukey's HSD,  $P < 10^{-7}$ ). Like the  
260 previous two experiments, we derived the PD of EMG activity during both the SLR and MOV  
261 epochs (**Fig. 4c**).

262 Across our sample, we observed a reliable shift in PD between the VIS and ROT blocks  
263 during the MOV epoch (**Fig. 4d**,  $\Delta$ PD = 93.6°  $\pm$  1.5° CW, one sample *t*-test,  $t_{12} = 63.0$ ,  $P < 10^{-15}$ ).  
264 In contrast, the SLR tuning did not reliably differ between the two blocks ( $\Delta$ PD = -2.5°  $\pm$  3.8°

265 CCW, one sample  $t$ -test,  $t_{12} = -0.7$ ,  $P = 0.52$ ). Although there was a significant attenuation in the  
266 amplitude of the SLR tuning curve between the VIS and ROT blocks (paired  $t$ -test,  $t_{12} = 5.96$ ,  $P$   
267  $< 10^{-4}$ ), this attenuation was most likely due to the corresponding increase in RT during the ROT  
268 block, as SLR magnitude is known to decrease when preceding movements with longer RTs  
269 [15,20]. This decrease in amplitude was also observed during the Peri-Rotation block in  
270 Experiment 1, when there was also an increase in median RTs, but a decrease in amplitude was  
271 not seen in Experiment 2, when there was no reliable increase in median RTs (see **Fig. 5** for the  
272 relationship between SLR amplitude fits and median RTs in all three experiments). Thus, in  
273 Experiment 3, learning induced during a mental visuomotor task did not systematically alter the  
274 tuning of the SLR.

275

## 276 **DISCUSSION**

277 Recent studies have suggested that motor learning can be driven by multiple learning  
278 components: an implicit learning component related to the mismatch between the actual and  
279 predicted sensory consequences of a generated motor command [5,9], and an explicit learning  
280 component that involves changes to aiming strategy [6,7]. What has not been clear from this  
281 literature is how such components engage various descending motor pathways. Here, we  
282 measured the changes in the directional tuning of EMG activity on the human pectoralis muscle  
283 during three variations of the visuomotor rotation task. We found both the implicit and explicit  
284 components of motor learning modulated the tuning of voluntary reach-related EMG activity. In  
285 contrast, we found that only the implicit motor learning component modulated the tuning of the  
286 earliest wave of muscle activity that is time-locked to the onset of a peripheral visual stimulus.

287

288 *Implicit motor learning drives the partial adaptation of SLR tuning during visuomotor rotations*

289 Our central result is that implicit motor learning altered the directional tuning during the SLR  
290 epoch (85-125 ms after stimulus onset), while both implicit and explicit motor learning altered  
291 the tuning of reach-related MOV activity (-20 to 20 ms around RT, ~200-300 ms after stimulus  
292 onset). Thus, implicit motor learning can induce adaptation in the fastest, essentially reflexive,  
293 visuomotor pathway. The amount of adaptation was considerably less than either of our imposed  
294 visuomotor rotations: SLR tuning changed by  $16.7^\circ \pm 3.6^\circ$  for a  $60^\circ$  visuomotor rotation in  
295 Experiment 1, and by  $12.8^\circ \pm 1.9^\circ$  for an overall  $40^\circ$  visuomotor rotation in Experiment 2. These  
296 observations match well with previous indirect behavioral estimates of implicit learning  
297 component of  $\sim 10^\circ$ - $15^\circ$  regardless of the magnitude of the imposed visuomotor rotation [6,21].  
298 Such estimates are based on a subtraction logic, wherein the implicit component is estimated as  
299 the difference between the actual reach direction and the verbal reporting of the participant's  
300 aiming direction.

301 The gradual visuomotor rotation used in Experiment 2 attempted to minimize the explicit  
302 aiming component of motor learning. Evidence that participants learned the new visuomotor  
303 mapping without using an explicit aiming strategy is found in the lack of difference in RTs  
304 between the veridical and rotation blocks (**Fig. 5**), and post-experiment confirmation that our  
305 participants were unaware of any changes in the visuomotor mapping during the experiment  
306 [29,30]. However, a previous study has reported impaired learning rates during a similar gradual  
307 visuomotor task when participants concurrently performed a cognitively demanding task [30],  
308 suggesting a distinction between explicit awareness and contribution of other forms of learning.  
309 This may explain why we only observed a partial adaptation of SLR tuning ( $\sim 13^\circ$ ) compared to a  
310 full adaptation during the MOV epoch ( $\sim 40^\circ$ ). Our paradigm was designed to test the influence

311 of error-based learning, but may have also engaged reinforcement-based learning [32] as  
312 participants gauged their success in hitting the target. Indeed, reinforcement-based learning was  
313 likely engaged in all three Experiments. Previous studies have shown that changes in  
314 sensorimotor mapping can be driven purely by reinforcement learning [33,34], which can occur  
315 without awareness [35]. However, unlike implicit motor learning, reinforcement learning does  
316 not produce aftereffects [36], and as shown in Experiment 3, does not change SLR tuning.

317

### 318 *Distinct neural substrates for the implicit and explicit components of motor learning*

319 To our knowledge, no previous animal neurophysiological or human imaging studies have  
320 described a neural correlate for partial adaptation during either a gradual or an abrupt visuomotor  
321 rotation task. Previous fMRI studies have shown that BOLD activity within the posterior parietal  
322 cortex (PPC) faithfully encodes visual stimulus location during the visuomotor rotation task,  
323 regardless of the ensuing reach direction [37,38]. Similarly, during saccadic adaptation, neurons  
324 within the lateral intraparietal cortex also encode visual stimulus location rather than saccadic  
325 endpoint [39]. Conversely, both fMRI and neurophysiological studies have shown that both  
326 premotor and primary motor cortices encode the final movement direction, regardless of the  
327 visual stimulus location [38,40–43]. Thus, the pattern of the modulation of SLR tuning is distinct  
328 from signals observed in either the PPC or motor cortices, which would presumably be relayed  
329 via corticospinal projections.

330 Previous clinical studies suggest that implicit and explicit components of motor learning  
331 have distinct underlying neural substrates. For example, even though patients with prefrontal  
332 lesions lacked any explicit awareness of changes during an abrupt visuomotor rotation task, they  
333 still partially adapted their reaching movements [10,11]. This result suggested that while the

334 explicit aiming component is impaired, the implicit motor learning component is spared in such  
335 patients. Conversely, patients with cerebellar damage show impairment when adapting to novel  
336 environments [44–46], regardless of the size or how the perturbation is imposed [47,48]. While  
337 these patients can still compensate for the sensorimotor perturbations through either  
338 reinforcement learning [33,36] or the use of an explicit aiming strategy [8], they still had  
339 impaired implicit error-based learning [8,9,36] and displayed much smaller aftereffects after  
340 motor learning [49].

341

#### 342 *A cerebellar influence on the tectoreticulospinal pathway*

343 Given that the cerebellum has been strongly implicated in implicit motor learning, we surmise  
344 that the changes in SLR tuning observed in Experiments 1 and 2 are modulated via the  
345 cerebellum. How then could the cerebellum be altering this visuomotor mapping? We have  
346 speculated that the SLR is mediated by a tectoreticulospinal pathway [15,18,20], and there is  
347 substantial evidence for interaction between the cerebellum and the reticular formation.  
348 Consistent with cerebellar projections to the reticular formation [50–52], electrical stimulation to  
349 both human [53] and non-human primate [54,55] cerebellum evokes short-latency EMG  
350 response on upper limb muscles. These responses are still intact even after the inactivation of the  
351 contralateral primary motor cortex [55]. Further, the cerebellum receives an internal copy of the  
352 descending reticulospinal command from propriospinal neurons via the lateral reticular nucleus  
353 [56].

354 The (tecto)-reticulospinal pathway has also been implicated in other rapid motor  
355 responses such as the startReact effect [57–60], forced-RT paradigms [25,61], or corrective reach  
356 movements [62–64]. Our results, which demonstrate a selective influence of implicit motor



357 learning on this descending pathway, may also explain the adaptation of these responses during  
358 various motor learning paradigms. For example, both startReact and corrective reach movements  
359 are modulated during motor learning induced by a force field [65,66] or, as studied here, a  
360 visuomotor rotation [67,68]. However, the contribution of implicit versus explicit components of  
361 motor learning was not considered in these paradigms. Here, by isolating EMG activity  
362 attributable to the tectoreticulospinal pathway and segregating the implicit and explicit  
363 components of motor learning, we can directly quantify the influence of different components of  
364 motor learning via the changes in the tuning of the SLR. Such an approach may be particularly  
365 useful for future work on motor learning in animal models to directly quantify implicit motor  
366 learning, serving as a benchmark for comparison with simultaneously recorded neural activity.

367

### 368 **Acknowledgments**

369 This work was supported by operating grants from the Natural Sciences and Engineering  
370 Research Council of Canada (NSERC) to BDC [RGPIN-311680], PLG [RGPIN-238338], JAP  
371 [RGPIN-2015-06714], from the Canadian Institutes of Health Research to BDC [MOP-93796], a  
372 NSERC Canada Graduate Doctoral Scholarship to CG, and a salary award from the Canada  
373 Research Chairs program to JAP.

374

### 375 **Author Contributions**

376 Conceptualization – CG, JAP, and BDC; Methodology – CG and PLG; Investigation – CG;  
377 Writing, Original Draft – CG and BDC; Writing, Review and Editing – JAP and PLG; Funding  
378 Acquisition – BDC; Resources – PLG; Supervision – JAP, PLG, and BDC;

379

380 **Declaration of Interests**

381 The authors declare no competing interests.

382

## 383 REFERENCES

- 384 1. Shadmehr, R., Smith, M.A., and Krakauer, J.W. (2010). Error correction, sensory  
385 prediction, and adaptation in motor control. *Annu Rev Neurosci* 33, 89–108.
- 386 2. Wolpert, D.M., Miall, R.C., and Kawato, M. (1998). Internal models in the  
387 cerebellum. *Trends Cogn Sci* 2, 338–347.
- 388 3. Thoroughman, K.A., and Shadmehr, R. (2000). Learning of action through  
389 adaptive combination of motor primitives. *Nature* 407, 742–747.
- 390 4. Krakauer, J.W. (2009). Motor learning and consolidation: the case of visuomotor  
391 rotation. *Adv Exp Med Biol* 629, 405–421.
- 392 5. Mazzoni, P., and Krakauer, J.W. (2006). An implicit plan overrides an explicit  
393 strategy during visuomotor adaptation. *J Neurosci* 26, 3642–3645.
- 394 6. Taylor, J.A., Krakauer, J.W., and Ivry, R.B. (2014). Explicit and implicit  
395 contributions to learning in a sensorimotor adaptation task. *J Neurosci* 34, 3023–  
396 3032.
- 397 7. Taylor, J.A., and Ivry, R.B. (2011). Flexible cognitive strategies during motor  
398 learning. *PLoS Comput Biol* 7, e1001096.
- 399 8. Taylor, J.A., Klemfuss, N.M., and Ivry, R.B. (2010). An explicit strategy prevails  
400 when the cerebellum fails to compute movement errors. *The Cerebellum* 9, 580–  
401 586.
- 402 9. Morehead, J.R., Taylor, J.A., Parvin, D., and Ivry, R.B. (2017). Characteristics of  
403 Implicit Sensorimotor Adaptation Revealed by Task-irrelevant Clamped Feedback.  
404 *J Cogn Neurosci* 25, 1–14.
- 405 10. Slachevsky, A., Pillon, B., Fournieret, P., Pradat-Diehl, P., Jeannerod, M., and  
406 Dubois, B. (2001). Preserved Adjustment but Impaired Awareness in a Sensory-  
407 Motor Conflict following Prefrontal Lesions. *J Cogn Neurosci* 13, 332–340.
- 408 11. Slachevsky, A., Pillon, B., Fournieret, P., Renié, L., Levy, R., Jeannerod, M., and  
409 Dubois, B. (2003). The prefrontal cortex and conscious monitoring of action: An  
410 experimental study. *Neuropsychologia* 41, 655–665.
- 411 12. Kuypers, H.G.J.M. (1981). Anatomy of the descending pathways. In *Handbook of*  
412 *Physiology - The Nervous System II.*, J. M. Brookhart and V. B. Mountcastle, eds.  
413 (Bethesda, MD: Am. Physiol. Soc.), pp. 597–666.
- 414 13. Lemon, R.N. (2008). Descending pathways in motor control. *Annu Rev Neurosci*  
415 31, 195–218.
- 416 14. Alstermark, B., and Isa, T. (2012). Circuits for skilled reaching and grasping. *Annu*  
417 *Rev Neurosci* 35, 559–578.
- 418 15. Pruszynski, J.A., King, G.L., Boisse, L., Scott, S.H., Flanagan, J.R., and Munoz,  
419 D.P. (2010). Stimulus-locked responses on human arm muscles reveal a rapid  
420 neural pathway linking visual input to arm motor output. *Eur J Neurosci* 32, 1049–  
421 1057.
- 422 16. Welford, A.T. (1980). Choice reaction time: basis concepts. In *Reaction times*, A.

- 423 T. Welford, ed. (New York, NY: Academic Press), pp. 73–128.
- 424 17. Gu, C., Pruszynski, J.A., Gribble, P.L., and Corneil, B.D. (2018). Done in 100 ms:  
425 path-dependent visuomotor transformation in the human upper limb. *J*  
426 *Neurophysiol* *119*, 1319–1328.
- 427 18. Wood, D.K., Gu, C., Corneil, B.D., Gribble, P.L., and Goodale, M.A. (2015).  
428 Transient visual responses reset the phase of low-frequency oscillations in the  
429 skeletomotor periphery. *Eur J Neurosci* *42*, 1919–1932.
- 430 19. Atsma, J., Majj, F., Gu, C., Medendorp, W.P., and Corneil, B.D. (2018). Active  
431 braking of whole-arm reaching movements provides single-trial neuromuscular  
432 measures of movement cancellation. *J Neurosci* *38*, 1745–17.
- 433 20. Gu, C., Wood, D.K., Gribble, P.L., and Corneil, B.D. (2016). A Trial-by-Trial  
434 Window into Sensorimotor Transformations in the Human Motor Periphery. *J*  
435 *Neurosci* *36*, 8273–8282.
- 436 21. Bond, K.M., and Taylor, J.A. (2015). Flexible explicit but rigid implicit learning in  
437 a visuomotor adaptation task. *J Neurophysiol* *113*, 3836–3849.
- 438 22. Pine, Z.M., Krakauer, J.W., Gordon, J., and Ghez, C. (1996). Learning of scaling  
439 factors and reference axes for reaching movements. *Neuroreport* *7*, 2357–2361.
- 440 23. Krakauer, J.W., Ghez, C., and Ghilardi, M.F. (2005). Adaptation to visuomotor  
441 transformations: consolidation, interference, and forgetting. *J Neurosci* *25*, 473–  
442 478.
- 443 24. Fernandez-Ruiz, J., Wong, W., Armstrong, I.T., and Flanagan, J.R. (2011).  
444 Relation between reaction time and reach errors during visuomotor adaptation.  
445 *Behav Brain Res* *219*, 8–14.
- 446 25. Haith, A.M., Huberdeau, D.M., and Krakauer, J.W. (2015). The Influence of  
447 Movement Preparation Time on the Expression of Visuomotor Learning and  
448 Savings. *J Neurosci* *35*, 5109–5117.
- 449 26. Werner, S., Schorn, C.F., Bock, O., Theysohn, N., and Timmann, D. (2014).  
450 Neural correlates of adaptation to gradual and to sudden visuomotor distortions in  
451 humans. *Exp Brain Res* *232*, 1145–1156.
- 452 27. Kagerer, F.A., Contreras-Vidal, J.L., and Stelmach, G.E. (1997). Adaptation to  
453 gradual as compared with sudden visuo-motor distortions. *Exp Brain Res* *115*,  
454 557–561.
- 455 28. Klassen, J., Tong, C., and Flanagan, J.R. (2005). Learning and recall of incremental  
456 kinematic and dynamic sensorimotor transformations. *Exp Brain Res* *164*, 250–259.
- 457 29. Honda, T., Hirashima, M., and Nozaki, D. (2012). Adaptation to visual feedback  
458 delay influences visuomotor learning. *PLoS One* *7*, e37900.
- 459 30. Galea, J.M., Sami, S.A., Albert, N.B., and Miall, R.C. (2010). Secondary tasks  
460 impair adaptation to step- and gradual-visual displacements. *Exp Brain Res* *202*,  
461 473–484.
- 462 31. Georgopoulos, A.P., and Massey, J.T. (1987). Cognitive spatial-motor processes -  
463 1. The making of movements at various angles from a stimulus direction. *Exp*

- 464 Brain Res 65, 361–370.
- 465 32. Lee, D., Seo, H., and Jung, M.W. (2012). Neural Basis of Reinforcement Learning  
466 and Decision Making. *Annu Rev Neurosci* 35, 287–308.
- 467 33. Izawa, J., and Shadmehr, R. (2011). Learning from sensory and reward prediction  
468 errors during motor adaptation. *PLoS Comput Biol* 7, e1002012.
- 469 34. Shmuelof, L., Huang, V.S., Haith, A.M., Delnicki, R.J., Mazzoni, P., and Krakauer,  
470 J.W. (2012). Overcoming Motor “Forgetting” Through Reinforcement Of Learned  
471 Actions. *J Neurosci* 32, 14617–14621a.
- 472 35. Alamia, A., Orban de Xivry, J.-J., San Anton, E., Olivier, E., Cleeremans, A., and  
473 Zenon, A. (2016). Unconscious associative learning with conscious cues. *Neurosci*  
474 *Conscious* 2016, niw016.
- 475 36. Therrien, A.S., Wolpert, D.M., and Bastian, A.J. (2016). Effective reinforcement  
476 learning following cerebellar damage requires a balance between exploration and  
477 motor noise. *Brain* 139, 101–114.
- 478 37. Fernandez-Ruiz, J., Goltz, H.C., DeSouza, J.F.X., Vilis, T., and Crawford, J.D.  
479 (2007). Human parietal “reach region” primarily encodes intrinsic visual direction,  
480 not extrinsic movement direction, in a visual motor dissociation task. *Cereb Cortex*  
481 17, 2283–2292.
- 482 38. Haar, S., Donchin, O., and Dinstein, I. (2015). Dissociating visual and motor  
483 directional selectivity using visuomotor adaptation. *J Neurosci* 35, 6813–6821.
- 484 39. Steenrod, S.C., Phillips, M.H., and Goldberg, M.E. (2013). The lateral intraparietal  
485 area codes the location of saccade targets and not the dimension of the saccades  
486 that will be made to acquire them. *J Neurophysiol* 109, 2596–2605.
- 487 40. Shen, L., and Alexander, G.E. (1997). Neural correlates of a spatial sensory-to-  
488 motor transformation in primary motor cortex. *J Neurophysiol* 77, 1171–1194.
- 489 41. Shen, L., and Alexander, G.E. (1997). Preferential representation of instructed  
490 target location versus limb trajectory in dorsal premotor area. *J Neurophysiol* 77,  
491 1195–1212.
- 492 42. Paz, R., Boraud, T., Natan, C., Bergman, H., and Vaadia, E. (2003). Preparatory  
493 activity in motor cortex reflects learning of local visuomotor skills. *Nat Neurosci* 6,  
494 882–890.
- 495 43. Perich, M.G., Gallego, J.A., and Miller, L.E. (2017). A neural population  
496 mechanism for rapid learning. *bioRxiv preprint*, 1–24.
- 497 44. Morton, S.M., and Bastian, A.J. (2004). Prism adaptation during walking  
498 generalizes to reaching and requires the cerebellum. *J Neurophysiol* 92, 2497–2509.
- 499 45. Tseng, Y.-W., Diedrichsen, J., Krakauer, J.W., Shadmehr, R., and Bastian, A.J.  
500 (2007). Sensory prediction errors drive cerebellum-dependent adaptation of  
501 reaching. *J Neurophysiol* 98, 54–62.
- 502 46. Rabe, K., Livne, O., Gizewski, E.R., Aurich, V., Beck, A., Timmann, D., and  
503 Donchin, O. (2009). Adaptation to visuomotor rotation and force field perturbation  
504 is correlated to different brain areas in patients with cerebellar degeneration. *J*

- 505 Neurophysiol *101*, 1961–1971.
- 506 47. Gibo, T.L., Criscimagna-Hemminger, S.E., Okamura, A.M., and Bastian, A.J.  
507 (2013). Cerebellar motor learning: are environment dynamics more important than  
508 error size? *J Neurophysiol* *110*, 322–333.
- 509 48. Schlerf, J.E., Xu, J., Klemfuss, N.M., Griffiths, T.L., and Ivry, R.B. (2013).  
510 Individuals with cerebellar degeneration show similar adaptation deficits with large  
511 and small visuomotor errors. *J Neurophysiol* *109*, 1164–1173.
- 512 49. Werner, S., Bock, O., Gizewski, E.R., Schoch, B., and Timmann, D. (2010).  
513 Visuomotor adaptive improvement and aftereffects are impaired differentially  
514 following cerebellar lesions in SCA and PICA territory. *Exp Brain Res* *201*, 429–  
515 439.
- 516 50. Gonzalo-Ruiz, A., Leichnetz, G.R., and Smith, D.J. (1988). Origin of cerebellar  
517 projections to the region of the oculomotor complex, medial pontine reticular  
518 formation, and superior colliculus in new world monkeys: A retrograde horseradish  
519 peroxidase study. *J Comp Neurol* *268*, 508–526.
- 520 51. Cohen, D., Chambers, W.W., and Sprague, J.M. (1958). Experimental study of the  
521 efferent projections from the cerebellar nuclei to the brainstem of the cat. *J Comp*  
522 *Neurol* *109*, 233–259.
- 523 52. Bantli, H., and Bloedel, J.R. (1975). Monosynaptic activation of a direct reticulo-  
524 spinal pathway by the dentate nucleus. *Pflugers Arch* *357*, 237–242.
- 525 53. Mottolese, C., Richard, N., Harquel, S., Szathmari, A., Sirigu, A., and Desmurget,  
526 M. (2013). Mapping motor representations in the human cerebellum. *Brain* *136*,  
527 330–342.
- 528 54. Soteropoulos, D.S., and Baker, S.N. (2008). Bilateral representation in the deep  
529 cerebellar nuclei. *J Physiol* *586*, 1117–1136.
- 530 55. Bantli, H., and Bloedel, J.R. (1975). The action of the dentate nucleus on the  
531 excitability of spinal motoneurons via pathways which do not involve the primary  
532 sensorimotor cortex. *Brain Res* *88*, 86–90.
- 533 56. Azim, E., Jiang, J., Alstermark, B., and Jessell, T.M. (2014). Skilled reaching relies  
534 on a V2a propriospinal internal copy circuit. *Nature* *508*, 357–363.
- 535 57. Honeycutt, C.F., Kharouta, M., and Perreault, E.J. (2013). Evidence for  
536 reticulospinal contributions to coordinated finger movements in humans. *J*  
537 *Neurophysiol* *110*, 1476–83.
- 538 58. Oude Nijhuis, L.B., Janssen, L., Bloem, B.R., van Dijk, J.G., Gielen, S.C., Borm,  
539 G.F., and Overeem, S. (2007). Choice reaction times for human head rotations are  
540 shortened by startling acoustic stimuli, irrespective of stimulus direction. *J Physiol*  
541 *584*, 97–109.
- 542 59. Valls-Solé, J., Solé, A., Valldeoriola, F., Muñoz, E., Gonzalez, L.E., and Tolosa,  
543 E.S. (1995). Reaction time and acoustic startle in normal human subjects. *Neurosci*  
544 *Lett* *195*, 97–100.
- 545 60. Carlsen, A.N., Chua, R., Inglis, J.T., Sanderson, D.J., and Franks, I.M. (2004).

- 546 Prepared movements are elicited early by startle. *J Mot Behav* 36, 253–264.
- 547 61. Haith, A.M., Pakpoor, J., and Krakauer, J.W. (2016). Independence of Movement  
548 Preparation and Movement Initiation. *J Neurosci* 36, 3007–3015.
- 549 62. Carlton, L.G. (1981). Processing visual feedback information for movement control.  
550 *J Exp Psychol Hum Percept Perform* 7, 1019–1030.
- 551 63. Day, B.L., and Brown, P. (2001). Evidence for subcortical involvement in the  
552 visual control of human reaching. *Brain* 124, 1832–1840.
- 553 64. Reynolds, R.F., and Day, B.L. (2012). Direct visuomotor mapping for fast visually-  
554 evoked arm movements. *Neuropsychologia* 50, 3169–3173.
- 555 65. Franklin, S., Wolpert, D.M., and Franklin, D.W. (2012). Visuomotor feedback  
556 gains upregulate during the learning of novel dynamics. *J Neurophysiol* 108, 467–  
557 478.
- 558 66. Wright, Z.A., Carlsen, A.N., MacKinnon, C.D., and Patton, J.L. (2015). Degraded  
559 expression of learned feedforward control in movements released by startle. *Exp*  
560 *Brain Res* 233, 2291–2300.
- 561 67. Telgen, S., Parvin, D., and Diedrichsen, J. (2014). Mirror reversal and visual  
562 rotation are learned and consolidated via separate mechanisms: recalibrating or  
563 learning de novo? *J Neurosci* 34, 13768–13779.
- 564 68. Hayashi, T., Yokoi, A., Hirashima, M., and Nozaki, D. (2016). Visuomotor Map  
565 Determines How Visually Guided Reaching Movements are Corrected Within and  
566 Across Trials. *eNeuro* 3.
- 567 69. Corneil, B.D., Olivier, E., and Munoz, D.P. (2004). Visual responses on neck  
568 muscles reveal selective gating that prevents express saccades. *Neuron* 42, 831–  
569 841.
- 570 70. Chapman, B.B., and Corneil, B.D. (2011). Neuromuscular recruitment related to  
571 stimulus presentation and task instruction during the anti-saccade task. *Eur J*  
572 *Neurosci* 33, 349–360.
- 573

574 **FIGURE LEGENDS**

575 **Figure 1: Experimental paradigm and spatial tuning of the stimulus-locked response (SLR)**  
576 **on human limb muscle during visually-guided reaches. a.** The mean  $\pm$  SD normalized  
577 movement trajectories for leftward and rightward visually-guided reach for a representative  
578 participant. **b.** The corresponding mean  $\pm$  SEM (top panels) and individual trials (bottom) of  
579 EMG activity from the right pectoralis major muscle aligned to visual stimulus onset (black line).  
580 For the color panels, each row represents EMG activity from a single trial, with trials sorted  
581 based on reach RT (squares). EMG activity diverged during the SLR epoch (shaded regions, 85-  
582 125 ms after stimulus onset), regardless of the ensuing RT. **c.** Sinusoidal relationship between  
583 the normalized mean EMG activity and visual stimulus location during the SLR (left panel) and  
584 MOV (right) epochs for this participant. Arrows indicate the PD of each fit. **d.** Experiments 1  
585 and 2: the visuomotor rotation task. Participants generating reach movements to move the cursor  
586 (red circle) to the visual stimulus location (black circle). To induce motor learning, the cursor  
587 was systematically rotated ( $60^\circ$  CW in this case) around the start position. **e.** Experiment 3: the  
588 mental rotation task. During the task, the cursor always gave veridical feedback of the robotic  
589 handle but participants were explicitly instructed to reach to the stimulus location  $90^\circ$  CCW to  
590 the visual stimulus location.

591

592 **Figure 2: Partial adaptation of the SLR tuning during the abrupt visuomotor rotation task.**

593 **a.** Timeline and behavioral performance during an  $60^\circ$  CW abrupt visuomotor rotation. The  
594 group mean  $\pm$  SEM (white circles and gray shade) reach endpoint per cycle relative to the  
595 stimulus location is plotted against perfect task performance (black line). Veridical visual  
596 feedback was provided during Pre- (black shade) and Post-Rotation (blue) blocks. During the



597 Peri-Rotation (red) block, the virtual cursor feedback was rotated around the start position by 60°  
598 CW. **b.** Mean  $\pm$  SD normalized movement trajectories and mean  $\pm$  SEM PEC EMG activity for  
599 the outward visual stimulus location (90° CCW from straight right) of a representative  
600 participant. The EMG activity is aligned to stimulus onset, and the SLR epoch (85-125 ms after  
601 stimulus onset) is highlighted. **c.** Sinusoidal tuning curve fits (**Eq. 1**) between visual stimulus  
602 location and the normalized mean EMG activity during the SLR (left panel) and MOV epochs  
603 (right). Each dot indicates data from a single trial, while the solid lines shows the best fit for each  
604 block; vertical arrows indicate the PDs for each fit. Note for illustration purposes only, we have  
605 staggered the individual trial data. Top inserts show the shifts in PD ( $\Delta PD$ ) during the Peri- and  
606 Post-Rotation blocks relative to the Pre-Rotation block. Vertical dashed gray line represents full  
607 adaptation to the 60° CW visuomotor rotation. **d.** Group mean  $\pm$  SEM of  $\Delta PD$  for both Peri- (red  
608 bars) and Post-Rotation blocks (blue) during both the SLR and MOV across all participants. A  
609  $\Delta PD = 0^\circ$  or  $\Delta PD = 60^\circ$  CW would indicate either no adaptation or a complete adaptation to the  
610 imposed rotation, respectively. Each gray line represents data from an individual participant,  
611 with the darker line indicating data from the participant in **c.** \* $P < 0.05$ .

612

613 **Figure 3: Partial adaptation of the SLR tuning during the gradual visuomotor rotation task.**

614 Same layout as **Fig. 2.** **a.** Timeline and behavioral performance during a gradual visuomotor  
615 rotation task. After the 40 cycles of reaches (Test Block 1) with veridical cursor feedback, the  
616 cursor was gradually rotated 1° per cycle to 20° CW (black solid line) or CCW (dashed line).  
617 After participants performed 40 cycles with the cursor constantly rotated 20° CW or CCW (Test  
618 Block 2), the cursor was rotated in the opposite direction for 40 cycles. Finally, participants  
619 performed 40 cycles with the cursor constantly rotated 20° CCW or CW (Test Block 3). Both

620 groups performed reaches with veridical (Pre-Rotation, black), 20° CW (red), and 20° CCW  
621 (blue) visual feedback blocks. **b.** Mean  $\pm$  SD movement trajectories and mean  $\pm$  SEM EMG  
622 activities for the left-inward visual stimulus location (225° CCW) during the three blocks from a  
623 participant who experienced the CW rotation first. **c.** PD for each of the Test Blocks during both  
624 the SLR and MOV epochs (vertical arrows). **d.** Mean  $\pm$  SEM of the  $\Delta$ PD for CW and CCW  
625 blocks compared to Pre-Rotation block for both the SLR and MOV epochs across all participants.  
626 Dashed or solid lines indicate participants who first experienced CW or CCW rotation,  
627 respectively. \*  $P < 0.05$ .

628

629 **Figure 4: SLR tuning did not adapt during a mental visuomotor rotation task.** Same layout  
630 as **Fig. 2.** **a.** Task schematic, timeline and behavioral performance for a representative participant  
631 during the mental visuomotor rotation task. Veridical visual feedback was given throughout the  
632 whole experiment. Participants were instructed to reach directly (VIS, black) or 90° CCW (ROT,  
633 red) to the stimulus location, with the order was counterbalanced across participants. **b.** Mean  $\pm$   
634 SD movement trajectory and mean  $\pm$  SEM EMG activity for both the leftward and rightward  
635 stimulus locations. **c.** PD for each both the VIS and ROT blocks during both the SLR and MOV  
636 epochs (vertical arrows). **d.** Mean  $\pm$  SEM of the  $\Delta$ PD between VIS and ROT blocks across all  
637 participants. \*  $P < 0.05$ .

638 **Figure 5: An explicit aiming strategy attenuated SLR magnitude and increased RTs a-c.**

639 Group mean  $\pm$  SEM of both the amplitude parameter for the sinusoidal fits during the SLR epoch  
640 (bars, left axis) and median RTs (lines, right axis) across the three different experiments. \*  $P <$   
641 0.05.

642

643 **STAR METHODS**

644 **Key Resources Table**

| REAGENT or RESOURCE                    | SOURCE                        | IDENTIFIER                                                          |
|----------------------------------------|-------------------------------|---------------------------------------------------------------------|
| Experimental Models: Organisms/Strains |                               |                                                                     |
| Healthy human participants             | University of Western Ontario | N/A                                                                 |
| Software and Algorithms                |                               |                                                                     |
| Matlab                                 | Mathworks                     | <a href="https://www.mathworks.com/">https://www.mathworks.com/</a> |

645

646 **Contact for Reagent and Resource Sharing**

647 All requests for further information and resources should be directed to and will be fulfilled by  
648 the Lead Contact, Dr. Brian D. Corneil.

649

650 **Experiment Model and Subject Details**

651 In total, we had 32 participants (21 males and 11 females, mean  $\pm$  SD age: 25  $\pm$  5 years old)  
652 perform at least one of the three experiments. All participants were self-declared right-handed  
653 expect for one left-handed male and four left-handed females, had normal or corrected-to-normal  
654 vision, and reported no current visual, neurological, and/or musculoskeletal disorders.  
655 Participants provided written consent, were paid for their participation, and were free to  
656 withdraw from any experiment at any time. All procedures were approved by the Health Science  
657 Research Ethics Board at the University of Western Ontario.

658

659 **Method Details**

660 The apparatus, electromyographic (EMG) recording setup, and parts of the data analyses has  
661 been previously described [17,18,20].

662 *Apparatus and kinematic acquisition*

663 Briefly, in all three experiments, participants sat at a desk with their right elbow supported by a  
664 custom-built air-sled. They performed right-handed horizontal planar reaches while holding the  
665 handle of a planar robotic manipulandum (InMotion Technologies, Watertown, MA, USA). The  
666  $x$ - and  $y$ -positions of the manipulandum were sampled and recorded at 600 Hz. A constant  
667 rightward load force of 5 N was applied throughout Experiments 2 and 3. No load was applied in  
668 Experiment 1. All visual stimuli were presented onto an upward-facing horizontal mirror, located  
669 just below the participant's chin level, which reflected the display of a downward-facing LCD  
670 monitor with a refresh rate of 75 Hz. The precise timing of the peripheral visual stimulus onset  
671 on the LCD screen was determined by a photodiode. The mirror occluded view of the  
672 participant's right arm throughout the experiment and real-time visual feedback of the handle of  
673 the manipulandum was given by a small red cursor on a white background.

674

675 *EMG acquisition*

676 EMG activity from the clavicular head of the right pectoralis major (PEC) muscle was recorded  
677 using either intramuscular (Experiment 1) or surface recordings (Experiment 2 and 3).  
678 Intramuscular EMG activity was recorded using fine-wire (A-M Systems, Sequim, WA, USA)  
679 electrodes inserted into the PEC muscle (see Wood et al., 2015 for insertion procedure). Briefly,  
680 for each recording we inserted two monopolar electrodes  $\sim 2.5$  cm into the belly the PEC muscle.  
681 Insertions were aimed  $\sim 1$  cm inferior to the inflection point of the clavicle, and staggered by 1  
682 cm along the muscle's fiber direction. All intramuscular EMG activity was recorded with a  
683 Myopac Junior System (Run Technologies, Mission Viejo, CA, USA). Surface recordings were  
684 made with doubled-differential electrodes (Delsys Inc., Natick, MA, USA) placed at the same

685 location as the intramuscular recordings. EMG activity and the photodiode signal were digitized  
686 and recorded at 4 kHz.

687

688 *Experiment 1: Abrupt visuomotor rotation task*

689 Each trial began with the appearance of a central start position. Participants ( $N = 7/8$  with a  
690 detectable SLR, SLR+, see below detection criterion) moved the cursor into the start position and  
691 after a randomized delay in the start position (1-1.25 sec) a peripheral black circle appeared (10  
692 cm away from the start position at one of eight equidistant locations). The onset of the peripheral  
693 visual stimulus coincided with the offset of the start position. Participants were instructed to  
694 perform an out-and-back reach movement towards the peripheral stimulus. Additionally, they  
695 were instructed to reach as accurately as possible with the cursor to the peripheral stimulus  
696 during the outward movement. A small yellow circle also appeared at the position where the  
697 cursor crossed the 10-cm radius of the start position; this provided additional visual feedback on  
698 the accuracy of the outward reach movement.

699 Each participant performed 11 sub-blocks during the experiment, each sub-block  
700 consisted of 20 cycles (**Fig. 2a**, one cycle consists of eight trials, one trial for each of the eight  
701 different stimulus locations). In the first three sub-blocks (Pre-Rotation Block, black shade), the  
702 cursor veridically represented handle position. During the next four sub-blocks (Peri-Rotation  
703 Block, red), the cursor representing handle position was rotated by  $60^\circ$  CW around the start  
704 position. In the final four sub-blocks (Post-Rotation Block, blue) the cursor once again  
705 represented handle position.

706

707 *Experiment 2: Gradual visuomotor rotation task*

708 Like in Experiment 1, participants ( $N = 14/14$  SLR+) moved the cursor into the start position and  
709 after a randomized delay in the start position (1-1.25 sec) a peripheral black circle appeared at  
710 one of eight equidistant locations around the start position. Participants were instructed to  
711 perform an out-and-back reach movement towards the peripheral stimulus and reach as  
712 accurately as possible with the cursor to the peripheral stimulus during the outward movement.  
713 However, during this task no yellow circle was presented after each outward reach movement.

714 Each participant performed nine sub-blocks, each consisting of 20 cycles (**Fig 3a**). In the  
715 first two sub-blocks (Test Block 1), the cursor veridically represented handle position. A gradual  
716 rotation was imposed during the third sub-block, in which the cursor representing handle position  
717 was rotated by  $1^\circ$  around the start position after each cycle; over the entire block the total  
718 rotation was  $19^\circ$ . During Test Block 2 (sub-blocks 4 and 5), participants performed reaches  
719 while the cursor was constantly rotated by  $20^\circ$ . In the next two sub-blocks (sub-blocks 6 and 7), a  
720 gradual rotation was imposed  $1^\circ$  per cycle in the opposite direction as in sub-block 3; thus, by  
721 the end of sub-block 7 the total rotation imposed during the two sub-blocks was  $39^\circ$ . During Test  
722 Block 3 (sub-blocks 8 and 9), participants reached with a constant  $20^\circ$  rotation, which was in the  
723 opposite direction as Test Block 2. Participants were counterbalanced between experiencing  
724 either a CW or CCW rotation first ( $N = 7$  per group, solid or dashed lines in **Fig. 3a**,  
725 respectively). Thus, all participants performed visually-guided reaches with veridical feedback  
726 (Pre-Rotation), and reaches with both a  $20^\circ$  CW and  $20^\circ$  CCW rotations (black, red, and blue  
727 shades in **Fig. 3a**, respectively).

728

729 *Experiment 3: Mental visuomotor rotation task*

730 Each trial began with the appearance of a start position and black outlines of the of eight  
731 equidistant locations 10 cm from the start position. Participants ( $N = 13/18$  SLR+) moved the  
732 cursor into the start position and after a randomized delay in the start position (1-1.25 sec) one of  
733 the peripheral stimulus location was filled. Each participant performed six sub-blocks of 20  
734 cycles (**Fig. 4a**). In three of the sub-blocks (VIS Block), participants performed out-and-back  
735 reach movements to the peripheral stimulus, while in the other three rotation sub-blocks (ROT  
736 Block), participants were instructed to reach towards the open stimulus location  $90^\circ$  CCW to the  
737 filled in peripheral stimulus location. Unlike Experiments 1 and 2, the cursor always veridically  
738 represented handle position throughout the experiment. The order of the blocks was  
739 counterbalanced between participants ( $N = 9$  per group).

740

741 **Quantification and Statistical Analyses**

742 *Data pre-processing*

743 All analyses were performed with custom-written scripts in Matlab (version R2014b, Mathworks  
744 Inc., Natick, MA, USA). To achieve sample matching between the kinematics and EMG data, all  
745 kinematic data was up-sampled from 600 Hz to 1000 Hz with a low-pass interpolation algorithm,  
746 and then lowpass-filtered with a second-order Butterworth filter with a cutoff at 150 Hz. Reach  
747 reaction times (RTs) were calculated as the time from the onset of the peripheral visual stimulus  
748 (measured by the photodiode) to the initiation of the reach movement. Reach initiation was  
749 identified by first finding the peak tangential movement velocity after stimulus onset, and then  
750 moving backwards to the closest time at which the tangential velocity profile surpassed 8% of  
751 the peak velocity. All EMG data was rectified and then either bin-integrated into 1 ms bins

752 (intramuscular) or down-sampled (surface) to 1000 Hz. EMG activity was then normalized  
753 relative to each block's mean baseline EMG activity (defined as the mean EMG activity 40 ms  
754 prior to the onset of the peripheral visual stimulus). We defined the SLR epoch as 85-125 ms  
755 after stimulus onset and the SLR magnitude as the mean EMG activity during the SLR epoch.  
756 We also defined the reach-related movement (MOV) epoch as 20 ms before to 20 ms after reach  
757 RT. All trials with RTs less than 185 ms were excluded to prevent contamination of the SLR  
758 epoch by shorter latency reach-related responses [18,20].

759 To determine the normalized movement trajectories, we first determined the movement  
760 duration for each trial individually. The movement duration was defined as the time when the  
761 handle position surpassed 2 cm from the center of the start position to 50 ms after the time when  
762 the handle position surpassed 8 cm from the center of the start position. We then interpolated the  
763 movement duration into 101 equally spaced time-samples, and calculated the  $x$ - and  $y$ -positions  
764 at each given time-sample.

765

#### 766 *SLR Detection and Latency Analysis*

767 Based on previous studies detecting the presence of the SLR [15,69], we also used a receiver-  
768 operating characteristic (ROC) analysis to quantitatively detect the presence of a SLR. In all  
769 experiments, we examined EMG activity for leftward and rightward reaches during veridical  
770 visual feedback, and we performed the following ROC analysis. For every time-sample (1 ms bin)  
771 between 100 ms before to 300 ms after visual stimulus onset, we calculated the area under the  
772 ROC curve between the leftward and rightward trials. This metric indicates the probability that  
773 an ideal observer could discriminate the side of the stimulus location based solely on EMG  
774 activity. A ROC value of 0.5 indicates chance discrimination, whereas a value of 1 or 0 indicates



775 perfectly correct or incorrect discrimination, respectively. We set the thresholds for  
776 discrimination at 0.6; these criteria exceed the 95% confidence intervals of data randomly  
777 shuffled with a bootstrap procedure [70]. The earliest discrimination time was defined as the  
778 time after stimulus onset at which the ROC was above 0.6 and remained above that threshold for  
779 at least 5 out of the next 10 samples. Previous studies have also reported decreased SLR  
780 magnitude during an anti-reach task [20], thus we lower our threshold to 0.55 for the ROT block  
781 in Experiment 3. Based on the ROC analyses we defined the SLR epoch as from 85 to 125 ms  
782 after visual stimulus onset and categorized any participant with a discrimination time <125 ms as  
783 having a SLR (SLR+ participant). Across the three experiments we could reliably detect a SLR  
784 in 29 out of 32 participants.

785

#### 786 *Tuning curve fit*

787 To determine the tuning curve of EMG activity during both the SLR and MOV epochs, we  
788 assumed that the relationship between EMG activity and the peripheral visual stimulus location  
789 took the form of a sinusoidal function **Eq. 1**:

$$790 \quad \quad \quad EMG(x) = A \times \cos(x - \theta) + \gamma \quad \quad \quad \text{(Equation 1)}$$

791 in which  $x$  is the angular location of the peripheral visual stimulus in degrees;  $EMG(x)$  is the  
792 logarithm of the normalized EMG activity for the given stimulus location;  $A$  is the amplitude of  
793 the sinusoidal fit;  $\theta$  is the preferred direction (PD) of the sinusoidal fit; and  $\gamma$  is the offset of the  
794 sinusoidal fit. We used Matlab's curve fitting toolbox, in which we constricted our parameters so  
795 that  $A < 0$  and  $0 \leq \theta < 360$ , and the starting point of the parameters were  $A = 1$ ,  $\theta = 180^\circ$ , and  
796  $\gamma = 0$ .

797

798 *Statistical Analyses*

799 All statistical analyses were performed using either a paired *t*-test or repeated-measure ANOVA.

800 For all post-hoc, we used a Tukey's HSD correction. The statistical significance was set as  $P <$

801 0.05.

802

803 **Data and Software Availability**

804 All data was analyzed using MATLAB R2014b.

805

806

807

808

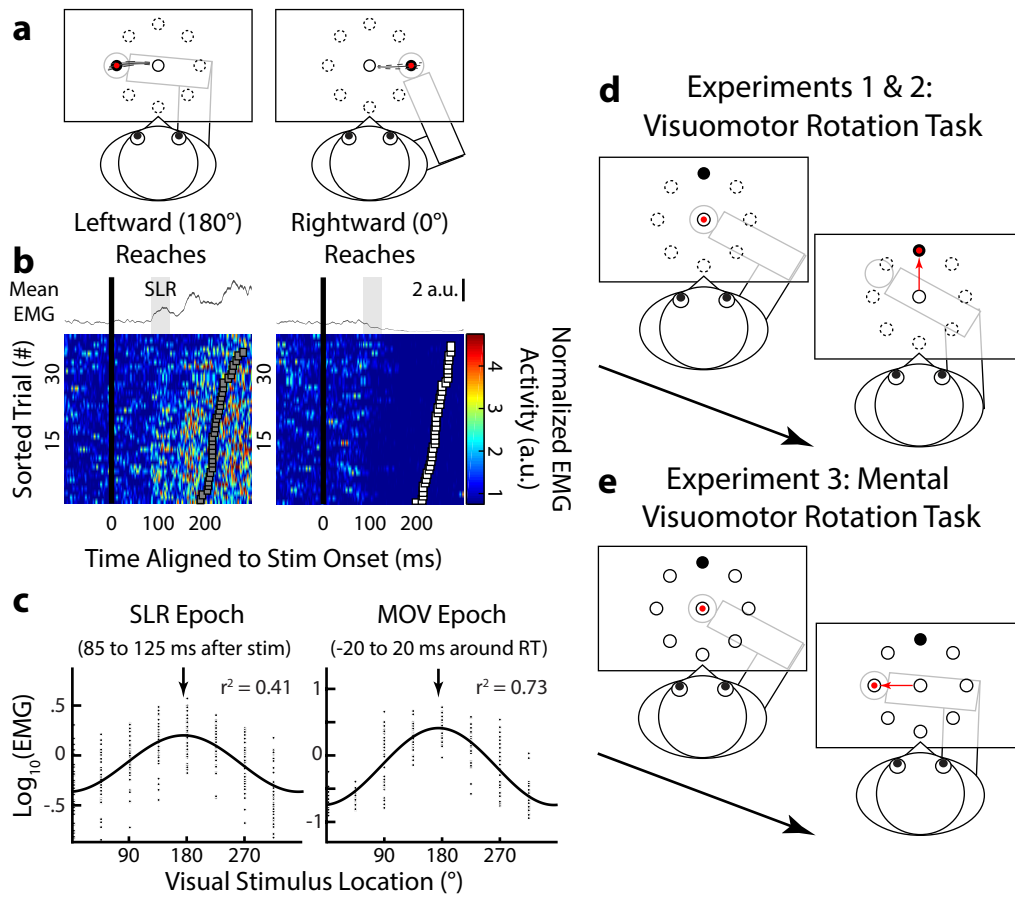

Figure 1

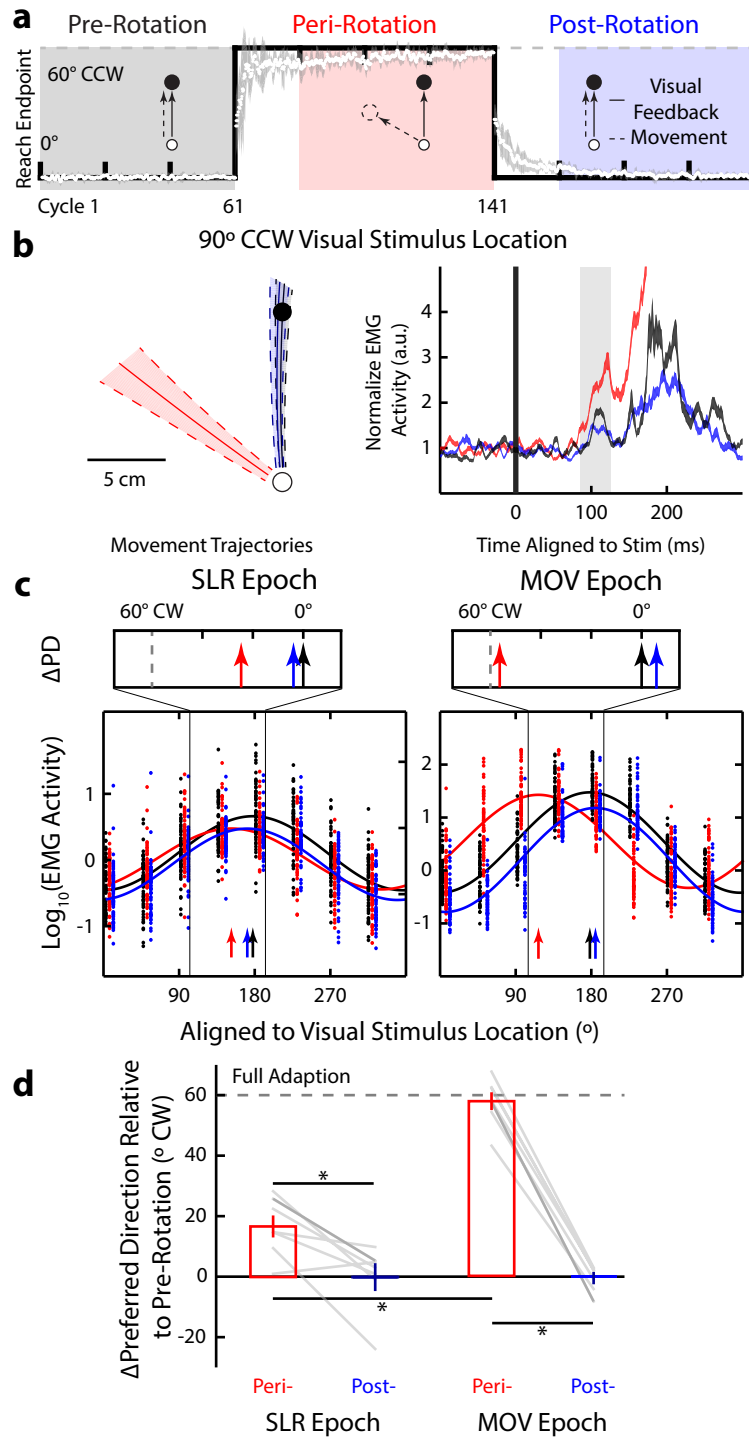

Figure 2

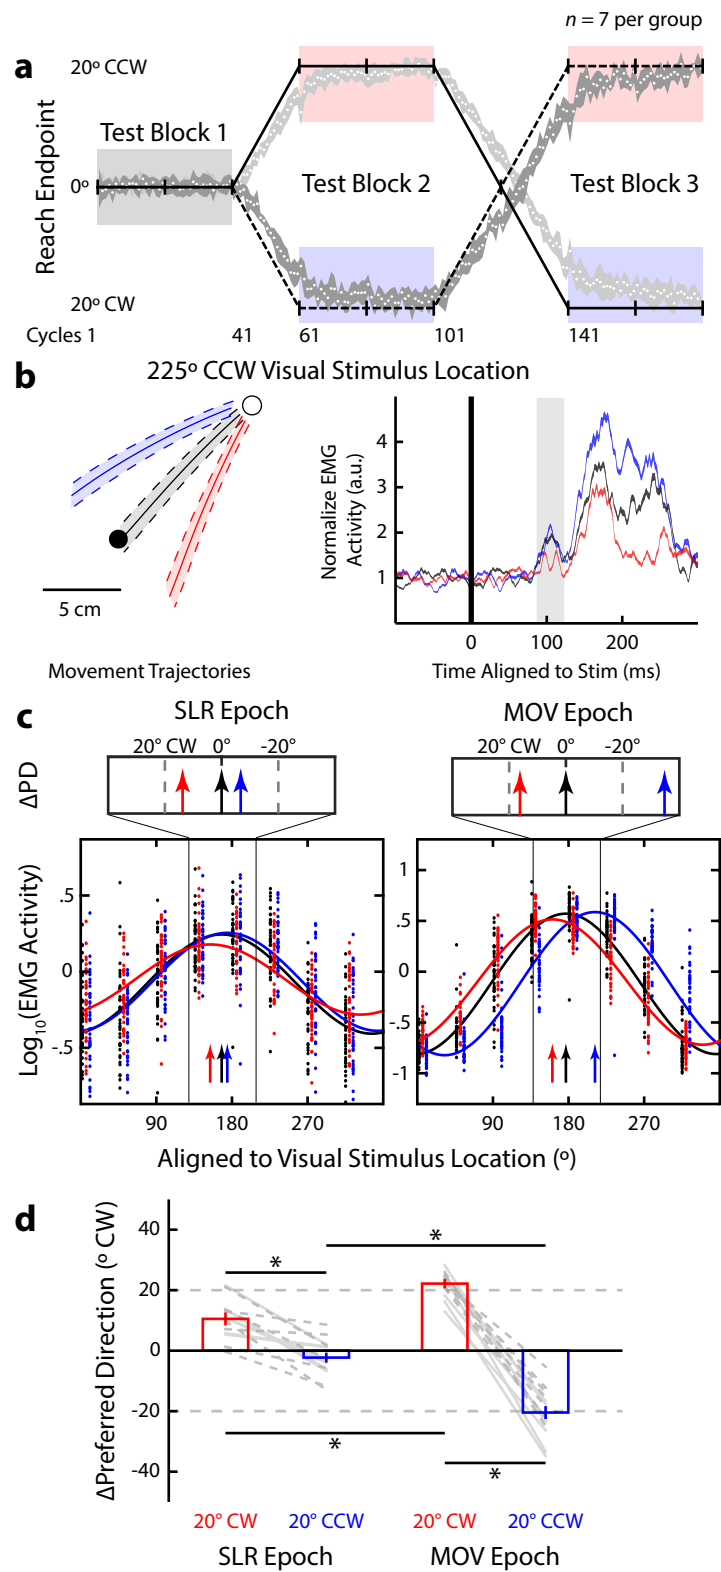

Figure 3

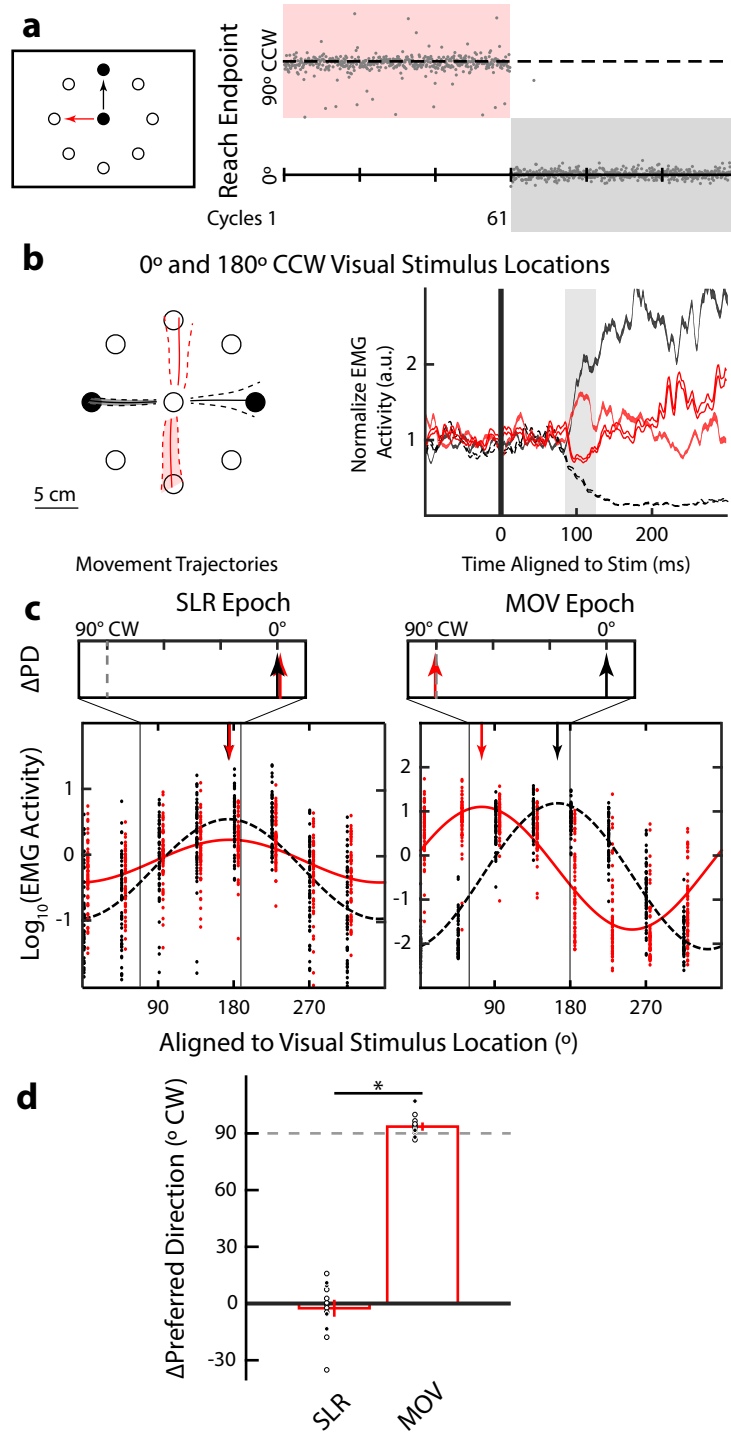

Figure 4

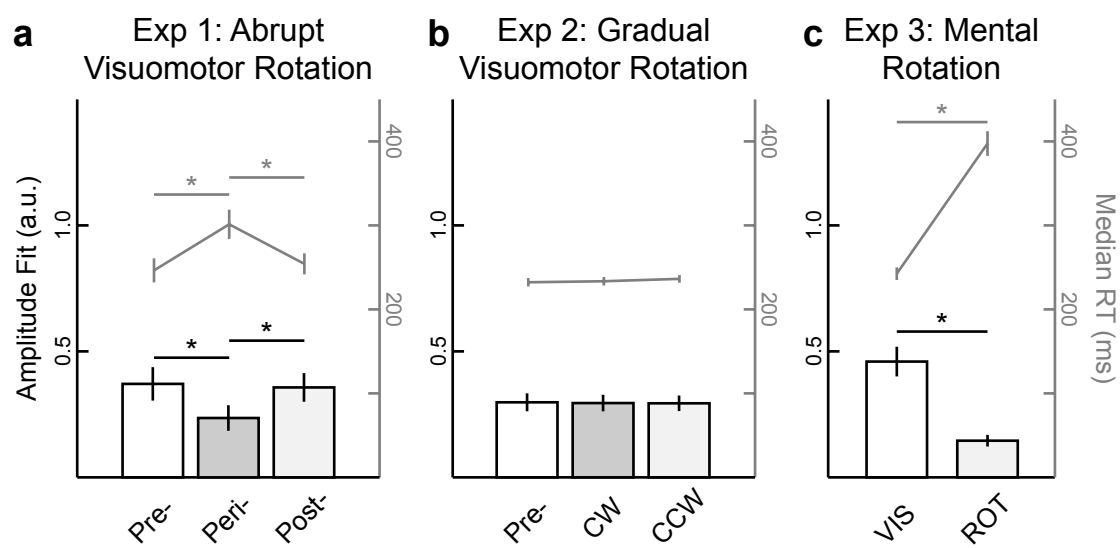

Source: https://www.biorxiv.org/content/10.1101/354381v1.full.pdf
